# Supplementary material for: The Psychophysiological Interrelationship between Working Conditions and Stress of Harvester and Forwarder Drivers – a Study Protocol
Source: Preprints.org preprint supplement (doi:10.20944/preprints202403.1326.v1), 2024-03-22
Supplement: Supplementary file 1 [file supplementary]

Diese Frage bezieht sich auf Ihre Schlafqualität im Allgemeinen in den vergangenen 24 Stunden. Bitte denken Sie jetzt an Ihre Schlafqualität insgesamt. Dazu zählt wie viele Stunden Sie geschlafen haben, wie einfach es war einzuschlafen, wie oft Sie in der Nacht aufgewacht sind (ausgenommen, um auf die Toilette zu gehen), wie oft Sie morgens früher aufgewacht sind als Sie müssten und wie erholsam Ihr Schlaf war.

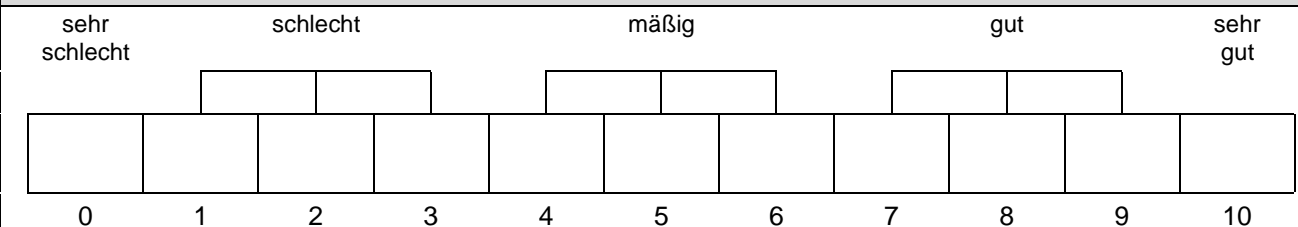

Während eines Naturaufenthalts ist es üblich, dass man Stimmungsveränderungen erlebt. Einige Menschen finden das angenehm, während andere dies als unangenehm empfinden. Darüber hinaus kann das Befinden mit der Zeit schwanken. Bitte schätzen Sie Ihre Stimmungslage ein, indem Sie die entsprechende Zahl ankreuzen.

|          |   |   |   |   |         |    |    |    |    |               |
|----------|---|---|---|---|---------|----|----|----|----|---------------|
| sehr gut |   |   |   |   | neutral |    |    |    |    | sehr schlecht |
| 5        | 4 | 3 | 2 | 1 | 0       | -1 | -2 | -3 | -4 | -5            |

Beurteilen Sie hier, wie aktiviert Sie sich derzeit fühlen. Mit „aktiviert“ ist gemeint, wie „aufgebracht“ oder „angespannt“ Sie sich fühlen. Sie können hohe Aktivierung in einer von einer Vielzahl von Möglichkeiten erleben, beispielsweise als Aufregung, Angst oder Ärger. Niedrige Aktivierung kann von Ihnen ebenfalls in einer von einer Reihe von Möglichkeiten erlebt werden, beispielsweise als Entspannung, Langeweile oder Gelassenheit. Bitte wählen Sie die zutreffende Antwort für jeden Punkt aus:

|             |         |   |   |   |   |      |
|-------------|---------|---|---|---|---|------|
|             | niedrig |   |   |   |   | hoch |
| Aktivierung | 1       | 2 | 3 | 4 | 5 | 6    |

Im Folgenden finden Sie eine Reihe von Aussagen, die sich auf Ihr augenblickliches Befinden beziehen. Bitte lesen Sie diese Sätze genau durch und entscheiden Sie sich bei jedem Satz für die Antwortmöglichkeit, die Ihrem momentanen Befinden am besten gerecht wird, und kreuzen Sie dies in der entsprechenden Antwortspalte an.

Bitte füllen Sie den Bogen zügig aus und nehmen Sie zu jeder Aussage Stellung!  
Haben Sie noch Fragen?

© Hogrefe Verlag Göttingen

Schlafdauer (letzte Nacht, in h : min):

Arbeitswegdauer (1 Richtung, in h : min):

|                                                                          | trifft zu | trifft nicht zu |
|--------------------------------------------------------------------------|-----------|-----------------|
| 1. Momentan könnte ich in Störfällen ganz schnell und richtig reagieren. |           |                 |
| 2. Jetzt habe ich noch Interesse an meiner Arbeitstätigkeit.             |           |                 |

|                                                                                                                                      | trifft zu | trifft nicht zu |
|--------------------------------------------------------------------------------------------------------------------------------------|-----------|-----------------|
| 3. Ich habe das Gefühl, dass mir momentan Abweichungen vom normalen Ablauf der Arbeit nicht auffallen.                               |           |                 |
| 4. Momentan wird mir die ganze Arbeit zu viel, ich habe zunehmend Bedenken, dass ich durch verkehrte Reaktionen Gefahren hervorrufe. |           |                 |
| 5. Ich habe diese Arbeit momentan satt.                                                                                              |           |                 |
| 6. Ich finde meine Arbeit momentan wenig abwechslungsreich.                                                                          |           |                 |
| 7. Schon leichte Störungen lassen mich zurzeit schnell nervös werden.                                                                |           |                 |
| 8. Ich bin zurzeit durch die Arbeit ein wenig träge und gelangweilt.                                                                 |           |                 |
| 9. Ich reagiere momentan nicht ganz so schnell.                                                                                      |           |                 |
| 10. Wenn ich immer wüsste, wie ich zu reagieren habe, würde mir die Arbeit nichts ausmachen.                                         |           |                 |
| 11. Momentan vergeht mir die Zeit sehr schnell.                                                                                      |           |                 |
| 12. Komplizierte Störsituationen könnte ich momentan ohne weiteres bewältigen.                                                       |           |                 |
| 13. Ich fühle mich gelöst und frisch.                                                                                                |           |                 |
| 14. Ich kann momentan noch den Überblick behalten.                                                                                   |           |                 |
| 15. Meine Arbeit ist mir zurzeit nicht gleichgültig.                                                                                 |           |                 |
| 16. Meine Arbeit regt mich an.                                                                                                       |           |                 |
| 17. Es besteht im Moment die Gefahr, dass ich einschlafe.                                                                            |           |                 |
| 18. Ich wäre froh, wenn ich ab und an etwas zu tun hätte.                                                                            |           |                 |
| 19. Würde jetzt eine Störung der verwendeten Technik eintreten, wäre ich in der Lage, gezielte Maßnahmen zu ergreifen.               |           |                 |
| 20. Die Arbeit ist momentan sehr anstrengend.                                                                                        |           |                 |
| 21. Die Arbeit bedrückt mich momentan nicht stark.                                                                                   |           |                 |
| 22. Im Moment bin ich durch meine Arbeit verstimmt.                                                                                  |           |                 |
| 23. In bestimmten Arbeitssituationen kommt es gegenwärtig vor, dass ich Angst habe.                                                  |           |                 |
| 24. Momentan weichen meine Gedanken häufiger von der Arbeit ab.                                                                      |           |                 |
| 25. Augenblicklich finde ich meine Arbeit sehr angenehm.                                                                             |           |                 |
| 26. Momentan ärgere ich mich über diese Arbeit.                                                                                      |           |                 |
| 27. Ich muss mich im Augenblick zusammenreißen, damit ich die Tätigkeit erledigen kann.                                              |           |                 |
| 28. Ich arbeite zurzeit ohne große Mühe.                                                                                             |           |                 |
| 29. Ich arbeite im Moment weiter, aber ohne Interesse.                                                                               |           |                 |
| 30. Ich fühle mich zurzeit stark abgespannt.                                                                                         |           |                 |
| 31. Zurzeit löse ich alle Probleme bei meiner Arbeit schnell.                                                                        |           |                 |
| 32. Um die Arbeit fortführen zu können, muss ich mich gegen die Müdigkeit wehren.                                                    |           |                 |
| 33. Ich bin auf Störungen eingestellt, dadurch kann ich momentan besser reagieren.                                                   |           |                 |
| 34. Ich habe momentan Bedenken, ich könnte nicht schnell genug eingreifen.                                                           |           |                 |
| 35. Ich bin momentan froh, wenn etwas zu tun ist.                                                                                    |           |                 |
| 36. Ich habe jetzt eine Art Dämmerzustand.                                                                                           |           |                 |
| 37. Augenblicklich habe ich fast einen Widerwillen gegen die Arbeit.                                                                 |           |                 |
| 38. Bei dieser Tätigkeit langweile ich mich jetzt nicht.                                                                             |           |                 |
| 39. Zurzeit ist die für meine Arbeit erforderliche Konzentration unverändert.                                                        |           |                 |
| 40. Ich bin momentan richtig an meiner Arbeit interessiert.                                                                          |           |                 |
|                                                                                                                                      | trifft zu | trifft nicht zu |
