# Supplementary material for: The Psychophysiological Interrelationship between Working Conditions and Stress of Harvester and Forwarder Drivers – a Study Protocol
Source: Preprints.org preprint supplement (doi:10.20944/preprints202403.1326.v1), 2024-03-22
Supplement: Supplementary file 2 [file supplementary]

**Fragen zu Ihrem momentanen Wohlbefinden und Ihrer aktuellen Stimmung.**
**FS) Wie schätzen Sie Ihr momentanes Wohlbefinden ein?**

Während eines Naturaufenthalts ist es üblich, dass man Stimmungsveränderungen erlebt. Einige Menschen finden das angenehm, während andere dies als unangenehm empfinden. Darüber hinaus kann das Befinden mit der Zeit schwanken. Bitte schätzen Sie Ihre Stimmungslage ein, indem Sie die entsprechende Zahl ankreuzen.

|          |   |   |   |   |         |    |    |    |    |               |
|----------|---|---|---|---|---------|----|----|----|----|---------------|
| sehr gut |   |   |   |   | neutral |    |    |    |    | sehr schlecht |
| 5        | 4 | 3 | 2 | 1 | 0       | -1 | -2 | -3 | -4 | -5            |

**BMS – B) Fragebogen zum Allgemeinen Gesundheitszustand**

Im Folgenden finden Sie eine Reihe von Aussagen, die sich auf Ihr augenblickliches Befinden beziehen. Bitte lesen Sie diese Sätze genau durch und entscheiden Sie sich bei jedem Satz für die Antwortmöglichkeit, die Ihrem momentanen Befinden am besten gerecht wird, und kreuzen Sie dies in der entsprechenden Antwortspalte an.

Bitte füllen Sie den Bogen zügig aus und nehmen Sie zu jeder Aussage Stellung!

Haben Sie noch Fragen?

© Hogrefe Verlag Göttingen

|                                                                                            | trifft zu | trifft nicht zu |
|--------------------------------------------------------------------------------------------|-----------|-----------------|
| 1. Gegenwärtig habe ich Spaß an der Arbeit.                                                |           |                 |
| 2. Mein Konzentrationsvermögen ist zurzeit einigermaßen gut.                               |           |                 |
| 3. Meine Arbeit ist gegenwärtig nicht eintönig.                                            |           |                 |
| 4. Ich arbeite momentan fast widerwillig.                                                  |           |                 |
| 5. Ich bin jetzt irgendwie lahm und schlapp.                                               |           |                 |
| 6. Ich möchte im Moment mehr zu tun haben.                                                 |           |                 |
| 7. Ich fühle mich im Augenblick bei meiner Arbeit unsicher.                                |           |                 |
| 8. Ich reagiere auf Störungen gegenwärtig gefasst.                                         |           |                 |
| 9. Ich muss gegenwärtig mehr Energie als sonst aufbringen, um die Arbeit auszuführen.      |           |                 |
| 10. Die Arbeit geht zurzeit mühelos.                                                       |           |                 |
| 11. Ich verliere zurzeit leicht den Überblick.                                             |           |                 |
| 12. Ich fühle mich abgespannt.                                                             |           |                 |
| 13. Ich arbeite im Moment weiter, aber ohne Interesse.                                     |           |                 |
| 14. Ich kann momentan in meinem Arbeitsbereich alles ohne größere Anstrengung überblicken. |           |                 |
| 15. Ich arbeite im Augenblick ungern.                                                      |           |                 |
| 16. Ich versuche, durch andere Beschäftigungen das Gefühl der Müdigkeit zu überwinden      |           |                 |
| 17. Augenblicklich finde ich meine Arbeit sehr angenehm.                                   |           |                 |
| 18. In bestimmten Arbeitssituationen kommt es vor, dass ich Angst habe.                    |           |                 |
| 19. Ich bin im Augenblick lustlos.                                                         |           |                 |
| 20. Die Arbeit bedrückt mich momentan nicht stark.                                         |           |                 |

|                                                                                               | trifft zu | trifft nicht zu |
|-----------------------------------------------------------------------------------------------|-----------|-----------------|
| 21. Ich muss mich zurzeit zur Arbeit zwingen.                                                 |           |                 |
| 22. Ich versuche momentan einzugreifen, bevor es zu größeren Störungen kommt.                 |           |                 |
| 23. Ich möchte im Moment ganz gern körperlich tätig sein.                                     |           |                 |
| 24. Ich bin zurzeit dem Einschlafen nahe.                                                     |           |                 |
| 25. Meine Arbeit ist zurzeit abwechslungsreich.                                               |           |                 |
| 26. In diesem Augenblick mache ich meine Arbeit gern.                                         |           |                 |
| 27. Zurzeit fühle ich mich den Anforderungen meiner Arbeit gerade gewachsen.                  |           |                 |
| 28. Zurzeit erfülle ich alle Arbeitsaufgaben sehr konzentriert.                               |           |                 |
| 29. Die zu treffenden Maßnahmen kann ich in Störsituationen ohne Schwierigkeiten durchführen. |           |                 |
| 30. Momentan vergeht die Zeit sehr schnell.                                                   |           |                 |
| 31. Ich habe mich daran gewöhnt, dass an meinem Arbeitsplatz ständig etwas passieren könnte.  |           |                 |
| 32. Ich reagiere momentan nicht ganz so schnell.                                              |           |                 |
| 33. Im Augenblick scheint mir die Zeit gar nicht zu vergehen.                                 |           |                 |
| 34. Ich werde im Augenblick bei der geringsten Störung unruhig.                               |           |                 |
| 35. Die Tätigkeit ist gegenwärtig recht einförmig, ich wäre über jede Abwechslung froh.       |           |                 |
| 36. Ich habe diese Arbeit momentan satt.                                                      |           |                 |
| 37. Ich mich im Moment angegriffen und zermüht.                                               |           |                 |
| 38. Es macht mir augenblicklich bei meiner Arbeit keine Mühe, Entscheidungen zu treffen.      |           |                 |
| 39. Im Moment ist mir die Arbeit noch halbwegs angenehm.                                      |           |                 |
| 40. Ich bin zurzeit leicht nervös.                                                            |           |                 |
