# Supplementary material for: The Psychophysiological Interrelationship between Working Conditions and Stress of Harvester and Forwarder Drivers – a Study Protocol
Source: Preprints.org preprint supplement (doi:10.20944/preprints202403.1326.v1), 2024-03-22
Supplement: Supplementary file 3 [file supplementary]

**A) Bitte beschreiben Sie Ihren letzten bzw. soeben abgeschlossenen Arbeits-Einsatz.****A1) Wie viele Mitarbeiter hat das Unternehmen, in dem Sie arbeiten?**

|                                                  |                                  |                                  |  |
|--------------------------------------------------|----------------------------------|----------------------------------|--|
| <input type="checkbox"/> 2 (mich eingeschlossen) | <input type="checkbox"/> 5 - 10  | <input type="checkbox"/> 20 - 30 |  |
| <input type="checkbox"/> 3                       | <input type="checkbox"/> 10 - 15 | <input type="checkbox"/> 30 - 40 |  |
| <input type="checkbox"/> 3 - 5                   | <input type="checkbox"/> 15 - 20 | <input type="checkbox"/> > 40    |  |

**A2) Wo fand Ihr letzter Einsatz statt?**

*Bitte Informationen zu: Forstbetrieb/ Eigentümer, Gemeinde, Abteilung/ Waldort (wenn bekannt)*

**A3) Wie lange hat Ihr letzter Einsatz gedauert?**

|                                 |                                 |                                          |  |
|---------------------------------|---------------------------------|------------------------------------------|--|
| <input type="checkbox"/> 1 Tag  | <input type="checkbox"/> 3 Tage | <input type="checkbox"/> 5 Tage          |  |
| <input type="checkbox"/> 2 Tage | <input type="checkbox"/> 4 Tage | <input type="checkbox"/> mehr als 5 Tage |  |

**A4) Auf einer Skala von 1 bis 5, wie schwierig schätzen Sie Ihren letzten Einsatz ein?**

|                             |               |          |          |          |               |
|-----------------------------|---------------|----------|----------|----------|---------------|
|                             | 1 sehr leicht | 2 leicht | 3 mittel | 4 schwer | 5 sehr schwer |
| Schwierigkeit des Einsatzes |               |          |          |          |               |

**A5) Wurde eine Traktionswinde zur Unterstützung der Maschine verwendet?**

|                             |                               |  |  |
|-----------------------------|-------------------------------|--|--|
| <input type="checkbox"/> Ja | <input type="checkbox"/> Nein |  |  |
|-----------------------------|-------------------------------|--|--|

**A6) Wie war die überwiegende Rückerichtung am Einsatzort?**

|                                  |                                 |                                |  |
|----------------------------------|---------------------------------|--------------------------------|--|
| <input type="checkbox"/> Bergauf | <input type="checkbox"/> Bergab | <input type="checkbox"/> Ebene |  |
|----------------------------------|---------------------------------|--------------------------------|--|

**A7) Wie schätzen Sie die durchschnittliche Hangneigung des Einsatzortes ein?**

|                                                  |                              |                              |                                        |
|--------------------------------------------------|------------------------------|------------------------------|----------------------------------------|
| <input type="checkbox"/> flach (weniger als 10%) | <input type="checkbox"/> 30% | <input type="checkbox"/> 60% | <input type="checkbox"/> 90%           |
| <input type="checkbox"/> 10%                     | <input type="checkbox"/> 40% | <input type="checkbox"/> 70% | <input type="checkbox"/> 100%          |
| <input type="checkbox"/> 20%                     | <input type="checkbox"/> 50% | <input type="checkbox"/> 80% | <input type="checkbox"/> mehr als 100% |

**A8) Wie lange dauert ein Arbeitstag im Durchschnitt?**

|                                        |                                         |                          |  |
|----------------------------------------|-----------------------------------------|--------------------------|--|
| <input type="checkbox"/> ≤ 4 Stunden   | <input type="checkbox"/> 8 - 12 Stunden | <input type="checkbox"/> |  |
| <input type="checkbox"/> 5 - 8 Stunden | <input type="checkbox"/> ≥ 12 Stunden   |                          |  |

**A9) Wie viele Pausen machen Sie pro Tag?**

|                                                 |                                   |                                   |                                            |
|-------------------------------------------------|-----------------------------------|-----------------------------------|--------------------------------------------|
| <input type="checkbox"/> Ich mache keine Pausen | <input type="checkbox"/> 2 Pausen | <input type="checkbox"/> 4 Pausen | <input type="checkbox"/> mehr als 5 Pausen |
| <input type="checkbox"/> 1 Pause                | <input type="checkbox"/> 3 Pausen | <input type="checkbox"/> 5 Pausen |                                            |

**A10) Wie lange dauert eine Pause im Durchschnitt?**

|                                                 |                                          |                                          |  |
|-------------------------------------------------|------------------------------------------|------------------------------------------|--|
| <input type="checkbox"/> Ich mache keine Pausen | <input type="checkbox"/> 5 ≤ 15 Minuten  | <input type="checkbox"/> 31 ≤ 60 Minuten |  |
| <input type="checkbox"/> < 5 Minuten            | <input type="checkbox"/> 16 ≤ 30 Minuten | <input type="checkbox"/> > 60 Minuten    |  |

**A11) Wie viel Erfahrung haben Sie im Umgang mit Harvester/ Forwarder?**

|                                      |                                      |                                      |  |
|--------------------------------------|--------------------------------------|--------------------------------------|--|
| <input type="checkbox"/> < 1 Jahr    | <input type="checkbox"/> 2 < 3 Jahre | <input type="checkbox"/> 4 > 5 Jahre |  |
| <input type="checkbox"/> 1 < 2 Jahre | <input type="checkbox"/> 3 < 4 Jahre | <input type="checkbox"/> ≥ 5 Jahre   |  |

|                                                                                                    |                                            |                                                                                   |                                             |
|----------------------------------------------------------------------------------------------------|--------------------------------------------|-----------------------------------------------------------------------------------|---------------------------------------------|
| A12) Benutzen Sie stets die gleiche Maschine/ den gleichen Typ oder haben Sie kürzlich gewechselt? |                                            |                                                                                   |                                             |
| <input type="checkbox"/> Ja, ich benutze stets die gleiche Maschine/ den gleichen Typ              |                                            | <input type="checkbox"/> Nein, ich habe kürzlich die Maschine/ den Typ gewechselt |                                             |
| A13) Tauschen Sie während eines Einsatzes zwischen Forwarder und Harvester?                        |                                            |                                                                                   |                                             |
| <input type="checkbox"/> Ja                                                                        |                                            | <input type="checkbox"/> Nein                                                     |                                             |
| A14) Wenn ja, wie häufig wechseln Sie zwischen Forwarder/ Harvester?                               |                                            |                                                                                   |                                             |
| <input type="checkbox"/> 1x/ Tag                                                                   | <input type="checkbox"/> öfter als 2x/ Tag | <input type="checkbox"/> 2x/ Woche                                                | <input type="checkbox"/> ich wechsele nicht |
| <input type="checkbox"/> 2x/ Tag                                                                   | <input type="checkbox"/> 1x/ Woche         | <input type="checkbox"/> öfter als 2x/ Woche                                      |                                             |

### SF-12: Fragebogen zum Allgemeinen Gesundheitszustand

Im Folgenden geht es um die Beurteilung Ihres Gesundheitszustandes. Der Bogen ermöglicht es, im Zeitverlauf nachzuvollziehen, **wie Sie sich fühlen und wie Sie im Alltag zurechtkommen**. Bitte beantworten Sie jede der Fragen, indem Sie bei den Antwortmöglichkeiten das ankreuzen, was am besten auf Sie zutrifft.

Wie würden Sie **Ihren Gesundheitszustand im allgemeinen** beschreiben?

|                                    | Ausgezeichnet | Sehr gut | Gut | Weniger gut | Schlecht |
|------------------------------------|---------------|----------|-----|-------------|----------|
| 1) Allgemeiner Gesundheitszustand. | 1             | 2        | 3   | 4           | 5        |

Im Folgenden sind einige **Tätigkeiten** beschrieben, die Sie vielleicht an einem **normalen Tag** ausüben.

Sind Sie durch Ihren **derzeitigen Gesundheitszustand** bei diesen Tätigkeiten eingeschränkt?

Wenn ja, wie stark?

|                                                                                               | Ja, etwas eingeschränkt | Ja, stark eingeschränkt | Nein, überhaupt nicht eingeschränkt |
|-----------------------------------------------------------------------------------------------|-------------------------|-------------------------|-------------------------------------|
| 2) mittelschwere Tätigkeiten, z.B. einen Tisch verschieben, staubsaugen, kegeln, Golf spielen | 1                       | 2                       | 3                                   |
| 3) mehrere Treppenabsätze steigen                                                             | 1                       | 2                       | 3                                   |

Hatten Sie in den **vergangenen 4 Wochen** aufgrund Ihrer **körperlichen Gesundheit** irgendwelche **Schwierigkeiten** bei der Arbeit oder anderen alltäglichen Tätigkeiten im Beruf bzw. zu Hause?

|                                               | Ja | Nein |
|-----------------------------------------------|----|------|
| 4) Ich habe weniger geschafft als ich wollte. | 1  | 2    |
| 5) Ich konnte nur bestimmte Dinge tun.        | 1  | 2    |

Hatten Sie in den **vergangenen 4 Wochen** aufgrund **seelischer Probleme** irgendwelche **Schwierigkeiten** bei der Arbeit oder anderen alltäglichen Tätigkeiten im Beruf bzw. zu Hause (z.B. weil Sie sich niedergeschlagen oder ängstlich fühlten)?

|                                                        | Ja | Nein |
|--------------------------------------------------------|----|------|
| 6) Ich habe weniger geschafft als ich wollte.          | 1  | 2    |
| 7) Ich konnte nicht so sorgfältig wie üblich arbeiten. | 1  | 2    |

8) Inwieweit haben die **Schmerzen** Sie in den **vergangenen 4 Wochen** bei der Ausübung Ihrer **Alltagstätigkeiten** zu Hause und im Beruf behindert?

| Überhaupt nicht | Ein bisschen | mäßig | ziemlich | sehr |
|-----------------|--------------|-------|----------|------|
| 1               | 2            | 3     | 4        | 5    |

|                                                                                                                                                                                                                                                         |          |          |        |     |         |            |                |            |          |       |
|---------------------------------------------------------------------------------------------------------------------------------------------------------------------------------------------------------------------------------------------------------|----------|----------|--------|-----|---------|------------|----------------|------------|----------|-------|
| In diesen Fragen geht es darum, <b>wie Sie sich fühlen</b> und wie es Ihnen in den <b>vergangenen 4 Wochen</b> gegangen ist.<br>(Bitte kreuzen Sie das an, was Ihrem Befinden am ehesten entspricht).<br>Wie oft waren Sie in den vergangenen 4 Wochen: |          |          |        |     | 1 immer | 2 meistens | 3 ziemlich oft | 4 manchmal | 5 selten | 6 nie |
| 9) ruhig und gelassen?                                                                                                                                                                                                                                  |          |          |        |     |         |            |                |            |          |       |
| 10) voller Energie?                                                                                                                                                                                                                                     |          |          |        |     |         |            |                |            |          |       |
| 11) entmutigt und traurig?                                                                                                                                                                                                                              |          |          |        |     |         |            |                |            |          |       |
| 12) Wie häufig haben Ihre <b>körperliche Gesundheit</b> oder <b>seelischen Probleme</b> in den <b>vergangenen 4 Wochen</b> Ihre Kontakte zu anderen Menschen (Besuche von Freunden, Verwandten usw.) beeinträchtigt?                                    |          |          |        |     |         |            |                |            |          |       |
| immer                                                                                                                                                                                                                                                   | meistens | manchmal | selten | nie |         |            |                |            |          |       |
| 1                                                                                                                                                                                                                                                       | 2        | 3        | 4      | 5   |         |            |                |            |          |       |

|                                                                                                                                                                                                                                                                                                                                       |  |  |  |       |          |            |            |       |            |         |
|---------------------------------------------------------------------------------------------------------------------------------------------------------------------------------------------------------------------------------------------------------------------------------------------------------------------------------------|--|--|--|-------|----------|------------|------------|-------|------------|---------|
| <b>OrgFit – Erfassung der Belastungen in der Arbeitswelt</b><br>Bitte geben Sie an, wie oft Sie in den letzten <b>4 Wochen</b> folgende Aspekte in Ihrem Arbeitsumfeld wahrgenommen haben. Zu jeder Frage sind sieben Antwortmöglichkeiten vorgegeben. Wählen Sie in Zweifelsfällen bitte diejenige Antwort, die am ehesten zutrifft. |  |  |  |       |          |            |            |       |            |         |
| © Jiménez, Dunkl & Bramberger 2014, Karl-Franzens-Universität Graz                                                                                                                                                                                                                                                                    |  |  |  |       |          |            |            |       |            |         |
| <b>Arbeitsaufgaben und Tätigkeiten</b>                                                                                                                                                                                                                                                                                                |  |  |  | 0 nie | 1 selten | 2 manchmal | 3 mehrmals | 4 oft | 5 sehr oft | 6 immer |
| Wie oft haben Sie in den letzten 4 Wochen folgende Aspekte wahrgenommen?                                                                                                                                                                                                                                                              |  |  |  |       |          |            |            |       |            |         |
| Bei der Arbeit durfte ich nur positive Gefühle zeigen, auch wenn mir nicht danach war.                                                                                                                                                                                                                                                |  |  |  |       |          |            |            |       |            |         |
| Bei der Arbeit musste ich eine unangenehme Körperhaltung einnehmen.                                                                                                                                                                                                                                                                   |  |  |  |       |          |            |            |       |            |         |
| In meinem Arbeitsumfeld gab es genügend Möglichkeiten zur Weiterentwicklung.                                                                                                                                                                                                                                                          |  |  |  |       |          |            |            |       |            |         |
| Bei der Arbeit musste ich hoch konzentriert sein.                                                                                                                                                                                                                                                                                     |  |  |  |       |          |            |            |       |            |         |

|                                                                          |  |  |  |       |          |            |            |       |            |         |
|--------------------------------------------------------------------------|--|--|--|-------|----------|------------|------------|-------|------------|---------|
| <b>Sozial- und Organisationsklima</b>                                    |  |  |  | 0 nie | 1 selten | 2 manchmal | 3 mehrmals | 4 oft | 5 sehr oft | 6 immer |
| Wie oft haben Sie in den letzten 4 Wochen folgende Aspekte wahrgenommen? |  |  |  |       |          |            |            |       |            |         |
| Ich bekam alle Informationen, die für meine Arbeit notwendig sind.       |  |  |  |       |          |            |            |       |            |         |
| Meine Führungskraft unterstützte mich in meinem Tätigkeitsbereich.       |  |  |  |       |          |            |            |       |            |         |
| In meinem Arbeitsumfeld konnte ich meine eigene Meinung einbringen.      |  |  |  |       |          |            |            |       |            |         |
| Meine Arbeitsleistung wurde fair behandelt.                              |  |  |  |       |          |            |            |       |            |         |
| Meine KollegInnen und ich unterstützten uns gegenseitig.                 |  |  |  |       |          |            |            |       |            |         |

|                                                                                            |  |  |  |       |          |            |            |       |            |         |
|--------------------------------------------------------------------------------------------|--|--|--|-------|----------|------------|------------|-------|------------|---------|
| <b>Arbeitsumgebung</b>                                                                     |  |  |  | 0 nie | 1 selten | 2 manchmal | 3 mehrmals | 4 oft | 5 sehr oft | 6 immer |
| Wie oft haben Sie in den letzten 4 Wochen folgende Aspekte wahrgenommen?                   |  |  |  |       |          |            |            |       |            |         |
| An meinem Arbeitsplatz war es so laut, dass ich meine Arbeit nicht gut durchführen konnte. |  |  |  |       |          |            |            |       |            |         |
| Die Ausstattung meines Arbeitsplatzes erschwerte mir die Durchführung meiner Arbeit.       |  |  |  |       |          |            |            |       |            |         |
| Ich wurde bei meinen Pausen gestört                                                        |  |  |  |       |          |            |            |       |            |         |
| Ich hatte die für meine Tätigkeit passenden Lichtverhältnisse.                             |  |  |  |       |          |            |            |       |            |         |
| Mir fehlte Platz für die Durchführung meiner Tätigkeiten.                                  |  |  |  |       |          |            |            |       |            |         |

|                                                                                                                       |  |  |  |  |  |  |  |
|-----------------------------------------------------------------------------------------------------------------------|--|--|--|--|--|--|--|
| Das Raumklima (z.B. Temperatur, Frischluftzufuhr, Zugluft, Luftfeuchtigkeit) an meinem Arbeitsplatz war unangenehm.   |  |  |  |  |  |  |  |
| In meiner Arbeitsumgebung befanden sich Gefahrenstellen (z.B. rutschiger Boden, unebener Boden, Stolperstellen etc.). |  |  |  |  |  |  |  |

| <b>Arbeitsabläufe und Arbeitsorganisation</b><br>Wie oft haben Sie in den letzten 4 Wochen folgende Aspekte wahrgenommen? | 0 nie | 1 selten | 2 manchmal | 3 mehrmals | 4 oft | 5 sehr oft | 6 immer |
|---------------------------------------------------------------------------------------------------------------------------|-------|----------|------------|------------|-------|------------|---------|
| Bei meiner Arbeit kam es zu Unterbrechungen bzw. Störungen (z.B. Anrufe, Anfragen, Ausfall der Arbeitsgeräte etc.).       |       |          |            |            |       |            |         |
| Ich hatte genug Zeit, um meine Arbeit durchzuführen.                                                                      |       |          |            |            |       |            |         |
| Ich musste für die Durchführung meiner Arbeitsaufgaben Überstunden machen.                                                |       |          |            |            |       |            |         |
| Bei meiner Arbeit kam es vor, dass ich Aufgaben doppelt oder mehrfach machen musste.                                      |       |          |            |            |       |            |         |
| In meinem Aufgabenbereich hatten sehr viele Personen Mitsprachrechte/Entscheidungsrechte.                                 |       |          |            |            |       |            |         |
| An meinem Arbeitsplatz waren die Zuständigkeiten und Verantwortlichkeiten klar geregelt.                                  |       |          |            |            |       |            |         |

### EBF-Work-27: Erholung und Belastung im Arbeitskontext

Sie finden in diesem Fragebogen eine Reihe von Feststellungen, die sich auf Ihr **körperliches und seelisches Befinden** oder Ihre Aktivitäten **in den letzten sieben Tagen und Nächten** beziehen.

Zu jeder Frage sind sieben Antwortmöglichkeiten vorgegeben. Kreuzen Sie bitte immer das an, was Ihrer Antwort entspricht.

Lassen Sie bitte keine Frage unbeantwortet und bearbeiten Sie die Fragen der Reihe nach ohne längere Unterbrechung.

Wählen Sie in Zweifelsfällen bitte diejenige Antwort, die am ehesten zutrifft.

© Jiménez & Kallus, 2016.

| <b>In den letzten (7) Tagen und Nächten</b>                                | nie | selten | manchmal | mehrmals | oft | sehr oft | immerzu |
|----------------------------------------------------------------------------|-----|--------|----------|----------|-----|----------|---------|
| 1) ... habe ich gelacht                                                    |     |        |          |          |     |          |         |
| 2) ... habe ich mich körperlich entspannt gefühlt                          |     |        |          |          |     |          |         |
| 3) ... war ich guter Dinge                                                 |     |        |          |          |     |          |         |
| 4) ... hatte ich Erfolg                                                    |     |        |          |          |     |          |         |
| 5) ... fühlte ich mich niedergeschlagen                                    |     |        |          |          |     |          |         |
| 6) ... hatte ich die "Nase voll"                                           |     |        |          |          |     |          |         |
| 7) ... hatte ich gute Laune                                                |     |        |          |          |     |          |         |
| 8) ... konnte ich meine Pausen erholsam nutzen                             |     |        |          |          |     |          |         |
| 9) ... bezweifelte ich die Bedeutung meiner Arbeit                         |     |        |          |          |     |          |         |
| 10) ... wurde ich bei wichtigen Entscheidungen miteinbezogen               |     |        |          |          |     |          |         |
| 11) ... hatte ich das Gefühl, dass viele meiner Bemühungen umsonst waren   |     |        |          |          |     |          |         |
| 12) ... fühlte ich mich sehr erschöpft                                     |     |        |          |          |     |          |         |
| 13) ... hatte ich Zeit für meine persönlichen Bedürfnisse                  |     |        |          |          |     |          |         |
| 14) ... konnte ich selbstständig Entscheidungen treffen                    |     |        |          |          |     |          |         |
| 15) ... habe ich erlebt, dass ich bei vielen Dingen nichts ausrichten kann |     |        |          |          |     |          |         |
| 16) ... konnte ich mich in den Pausen erholen                              |     |        |          |          |     |          |         |
| 17) ... fühlte ich mich durch meine Arbeit frustriert                      |     |        |          |          |     |          |         |
| 18) ... konnte ich selbst entscheiden, wie ich meine Aufgaben erledige     |     |        |          |          |     |          |         |

| In den letzten (7) Tagen und Nächten                                      | nie | selten | manchmal | mehrmals | oft | sehr oft | immerzu |
|---------------------------------------------------------------------------|-----|--------|----------|----------|-----|----------|---------|
| 19) ... konnte ich für meine Tätigkeit keine Begeisterung mehr aufbringen |     |        |          |          |     |          |         |
| 20) ... konnte ich meine Stärken in der Arbeit einsetzen                  |     |        |          |          |     |          |         |
| 21) ... hatte ich die Gelegenheit zur Erholung und Entspannung            |     |        |          |          |     |          |         |
| 22) ... hatte ich das Gefühl, dass meine Arbeit nicht sehr anerkannt wird |     |        |          |          |     |          |         |
| 23) ... habe ich unter KollegInnen Zusammenhalt erlebt                    |     |        |          |          |     |          |         |
| 24) ... hatte ich die Möglichkeit, Vorschläge zu äußern                   |     |        |          |          |     |          |         |
| 25) ... fühlte ich mich durch die Arbeit ausgebrannt                      |     |        |          |          |     |          |         |
| 26) ... hatte ich die Gelegenheit, vielfältige Aufgaben zu bearbeiten     |     |        |          |          |     |          |         |
| 27) ... wurde ich von meinen KollegInnen unterstützt                      |     |        |          |          |     |          |         |

|                                                                    |                                   |                                 |  |
|--------------------------------------------------------------------|-----------------------------------|---------------------------------|--|
| <b>Bitte beantworten Sie die folgenden Fragen zu Ihrer Person.</b> |                                   |                                 |  |
| Wie alt sind Sie? <i>Bitte Angabe in Jahren</i>                    |                                   |                                 |  |
|                                                                    |                                   |                                 |  |
| Wie groß sind Sie? <i>Bitte Angabe in cm</i>                       |                                   |                                 |  |
|                                                                    |                                   |                                 |  |
| Bitte geben Sie Ihr Körpergewicht an.                              |                                   |                                 |  |
|                                                                    |                                   |                                 |  |
| Bitte geben Sie Ihr Geschlecht an.                                 |                                   |                                 |  |
| <input type="checkbox"/> Männlich                                  | <input type="checkbox"/> Weiblich | <input type="checkbox"/> Divers |  |
